# Supplementary material for: The chromosome 6q22.33 region is associated with age at diagnosis of type 1 diabetes and disease risk in those diagnosed under 5 years of age
Source: PubMed Central journal article supplement (PMC5719131; doi:10.1007/s00125-017-4440-y), 2017-10-05
Supplement: 125_2017_4440_MOESM1_ESM.pdf [file 125_2017_4440_MOESM1_ESM.pdf]

## **Electronic Supplementary Material**

**Genotyping:** Genotyping was performed in three separate batches, the first containing samples from UK GRID cases, the second on all T1DGC, and the third on all remaining cases (IDDMGEN, T1DGEN, Northern Irish GRID and WARREN cohorts).

**Quality control:** Quality control (QC) was performed separately by genotype batch. Individuals were excluded from the analysis if they had a low call rate or high heterozygosity rate, as these are indicators of poor genotyping. Individuals were also excluded if they had a very high pairwise identical by state proportion, as these would likely be duplicates. Finally, if an individual of a given sex had a very high or low homozygosity rate on their X-chromosome compared to that expected from that sex, they were excluded from the analysis. The per-individual cut-off values for excluding samples from the analysis were dictated by visual inspection of QC plots (Supplementary Figures 1, 2 and 3) rather than using set rules across all batches. Per-SNP QC was also performed, removing SNPs with >5% missing values and SNPs with a minor allele frequency (MAF)  $<5 \times 10^{-5}$ . Since Hardy-Weinberg Equilibrium (HWE) is important to check for in controls, we included SNPs that violated HWE but checked signal cloud plots at SNPs that were significantly associated with AAD using ImmunoBase ([www.immunobase.org](http://www.immunobase.org)) to ensure the genotype groups were in distinct clusters.

**ESM Table 1:** Control patients included in meta-analysis examining type 1 diabetes risk overall and by age-strata

| <b>Cohort</b>             | <b>Analysed against which cases</b> | <b>Type of controls</b>                       | <b>Number</b> |
|---------------------------|-------------------------------------|-----------------------------------------------|---------------|
| T1DGC                     | T1DGC                               | Parents/siblings of T1DGC affected sib-pairs  | 6,282         |
| IDDMGEN                   | IDDMGEN                             | Parents/siblings of IDDMGEN cases             | 2,390         |
| WARREN                    | WARREN                              | Parents/siblings of WARREN affected sib-pairs | 735           |
| 1958 British Birth Cohort | UK GRID                             | Independent controls                          | 6,595         |
| UK Blood Service          | UK GRID                             | Independent controls                          | 3,023         |
| NI GRID                   | NI GRID                             | Independent controls                          | 485           |
| <b>Total</b>              |                                     |                                               | <b>19,510</b> |

**ESM Table 2:** Candidate causal variants AAD of type 1 diabetes in the 6q22.33 region, according to GUESSFM fine-mapping analysis for three, two and six SNPs expected in the region *a priori*. SNPs are colour-coded according to GUESSFM group.

| Group    | SNP         | Position (GRCh37) | gMPPI when number expected SNPs in model=3 | gMPPI when number expected SNPs in model=2 | gMPPI when number expected SNPs in model=6 |
|----------|-------------|-------------------|--------------------------------------------|--------------------------------------------|--------------------------------------------|
| 1        | rs802750    | 128265919         |                                            |                                            |                                            |
|          | rs802747    | 128268565         |                                            |                                            |                                            |
|          | rs802744    | 128272324         |                                            |                                            |                                            |
|          | rs802743    | 128272876         |                                            |                                            |                                            |
|          | rs802740    | 128276700         |                                            |                                            |                                            |
|          | rs802739    | 128277210         |                                            |                                            |                                            |
|          | rs802738    | 128277933         |                                            |                                            |                                            |
|          | rs802737    | 128278053         |                                            |                                            |                                            |
|          | rs376827043 | 128278122         |                                            |                                            |                                            |
|          | rs1418600   | 128278230         |                                            |                                            |                                            |
|          | rs1418601   | 128278231         |                                            |                                            |                                            |
|          | rs802735    | 128278336         | 0.497                                      | 0.488                                      | 0.55                                       |
|          | rs802733    | 128279185         |                                            |                                            |                                            |
|          | rs802732    | 128279422         |                                            |                                            |                                            |
|          | rs35576497  | 128279497         |                                            |                                            |                                            |
|          | rs802728    | 128281556         |                                            |                                            |                                            |
|          | rs802727    | 128281661         |                                            |                                            |                                            |
|          | rs802726    | 128281861         |                                            |                                            |                                            |
|          | rs1089652   | 128282783         |                                            |                                            |                                            |
|          | rs802724    | 128283193         |                                            |                                            |                                            |
| rs802722 | 128284219   |                   |                                            |                                            |                                            |
| rs802721 | 128284771   |                   |                                            |                                            |                                            |
| 2        | rs802746    | 128269180         |                                            |                                            |                                            |
|          | rs802734    | 128278798         |                                            |                                            |                                            |
|          | rs802731    | 128279429         |                                            |                                            |                                            |
|          | rs802730    | 128280104         |                                            |                                            |                                            |
|          | rs802725    | 128282029         |                                            |                                            |                                            |
|          | rs1089653   | 128282758         |                                            |                                            |                                            |
|          | rs802719    | 128289019         | 0.416                                      | 0.416                                      | 0.463                                      |
|          | rs3190930   | 128291199         |                                            |                                            |                                            |
|          | rs41285280  | 128291649         |                                            |                                            |                                            |
|          | rs4559105   | 128292392         |                                            |                                            |                                            |
|          | rs55743914  | 128293562         |                                            |                                            |                                            |
|          | rs35469349  | 128294709         |                                            |                                            |                                            |
| 3        | rs6939352   | 128266250         |                                            |                                            |                                            |
|          | rs9491889   | 128270067         |                                            |                                            |                                            |
|          | rs9491890   | 128270123         |                                            |                                            |                                            |
|          | rs9491891   | 128277151         |                                            |                                            |                                            |
|          | rs147626184 | 128277275         |                                            |                                            |                                            |
|          | rs118097399 | 128278233         |                                            |                                            |                                            |
|          | rs9491892   | 128280358         |                                            |                                            |                                            |
|          | rs9482848   | 128280375         |                                            |                                            |                                            |
|          | rs9491893   | 128280931         |                                            |                                            |                                            |
|          | rs113297984 | 128286301         |                                            |                                            |                                            |
|          | rs72973797  | 128286386         | 0.962                                      | 0.962                                      | 0.95                                       |
|          | rs72973800  | 128287158         |                                            |                                            |                                            |
|          | rs761332    | 128287848         |                                            |                                            |                                            |
|          | rs9482849   | 128288536         |                                            |                                            |                                            |
|          | rs12111314  | 128289214         |                                            |                                            |                                            |
|          | rs11753289  | 128291681         |                                            |                                            |                                            |
|          | rs9482850   | 128293506         |                                            |                                            |                                            |
|          | rs9482851   | 128293634         |                                            |                                            |                                            |
|          | rs72975913  | 128293932         |                                            |                                            |                                            |
|          | rs72975916  | 128294055         |                                            |                                            |                                            |

---

|             |           |
|-------------|-----------|
| rs7738609   | 128295502 |
| rs138300818 | 128297022 |
| rs3901020   | 128297604 |
| rs4510698   | 128297611 |

---

**ESM Table 3:** Results of type 1 diabetes risk in those diagnosed at a young age, using different cut-offs to define the youngest AAD strata

| <b>SNP</b> | <b>Cut-off</b> | <b>N cases</b> | <b>OR (95% CI)</b> | <b>p-value</b> |
|------------|----------------|----------------|--------------------|----------------|
| rs72975913 | <5             | 3,807          | 0.78 (0.72 - 0.85) | 2.32e-09       |
|            | <4             | 2,846          | 0.75 (0.68 - 0.82) | 1.01e-09       |
|            | <6             | 4,758          | 0.80 (0.74 - 0.86) | 3.8e-09        |
| rs802719   | <5             | 3,806          | 1.14 (1.07 - 1.20) | 2.23e-05       |
|            | <4             | 2,846          | 1.13 (1.06 - 1.21) | 1.98e-04       |
|            | <6             | 4,757          | 1.12 (1.06 - 1.18) | 5.06e-05       |

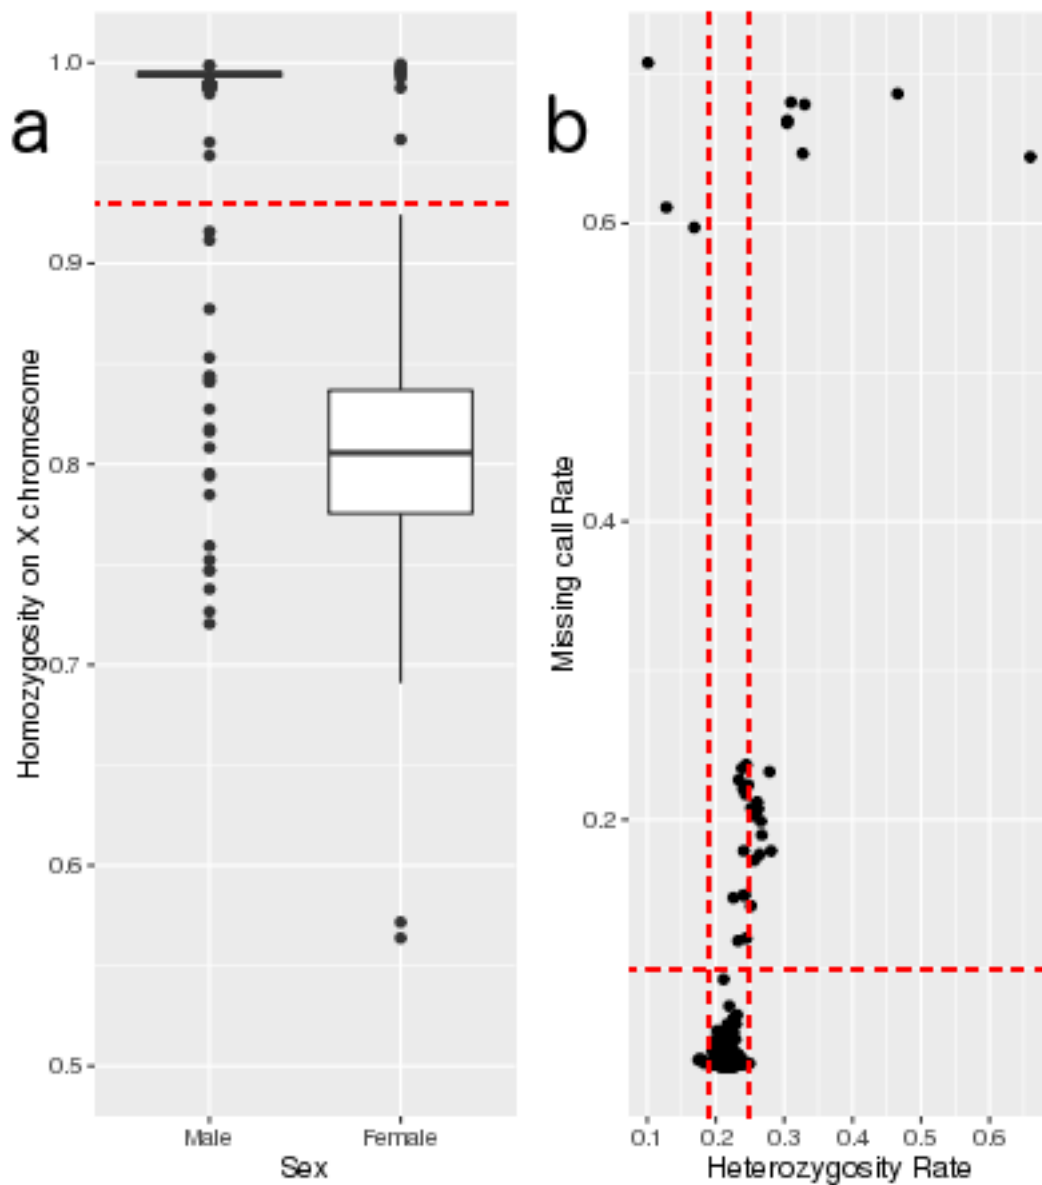

**ESM Figure 1:** Quality control plots for the UK GRID dataset. Panel a) shows the homozygosity rate on the X chromosome by sex, where one would expect males to have most alleles as homozygous. Low homozygosity rate in males or homozygosity rate close to 1 in females indicates poor genotyping or sample swaps and therefore samples are excluded from the analysis. Panel b) shows individuals with particularly high missingness or heterozygosity rate across the non-sex chromosomes, for which individuals are excluded from the analysis. Samples outside the red dashed lines were excluded.

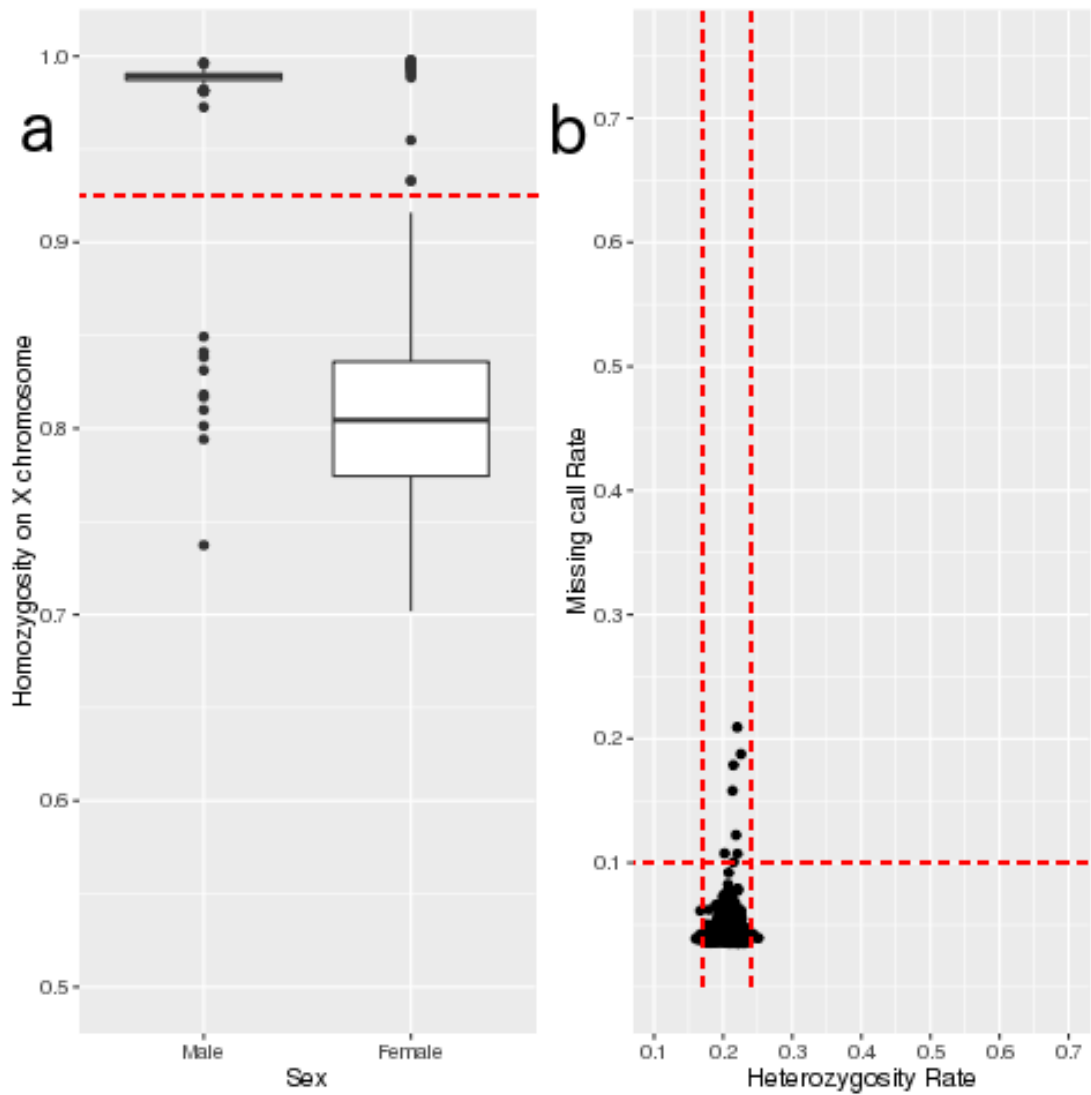

**ESM Figure 2:** Quality control plots for the T1DGC affected sib-pairs dataset. Panel a) shows the homozygosity rate on the X chromosome by sex, where one would expect males to have most alleles as homozygous. Low homozygosity rate in males or homozygosity rate close to 1 in females indicates poor genotyping or sample swaps and therefore samples are excluded from the analysis. Panel b) shows individuals with particularly high missingness or heterozygosity rate across the non-sex chromosomes, for which individuals are excluded from the analysis. Samples outside the red dashed lines were excluded.

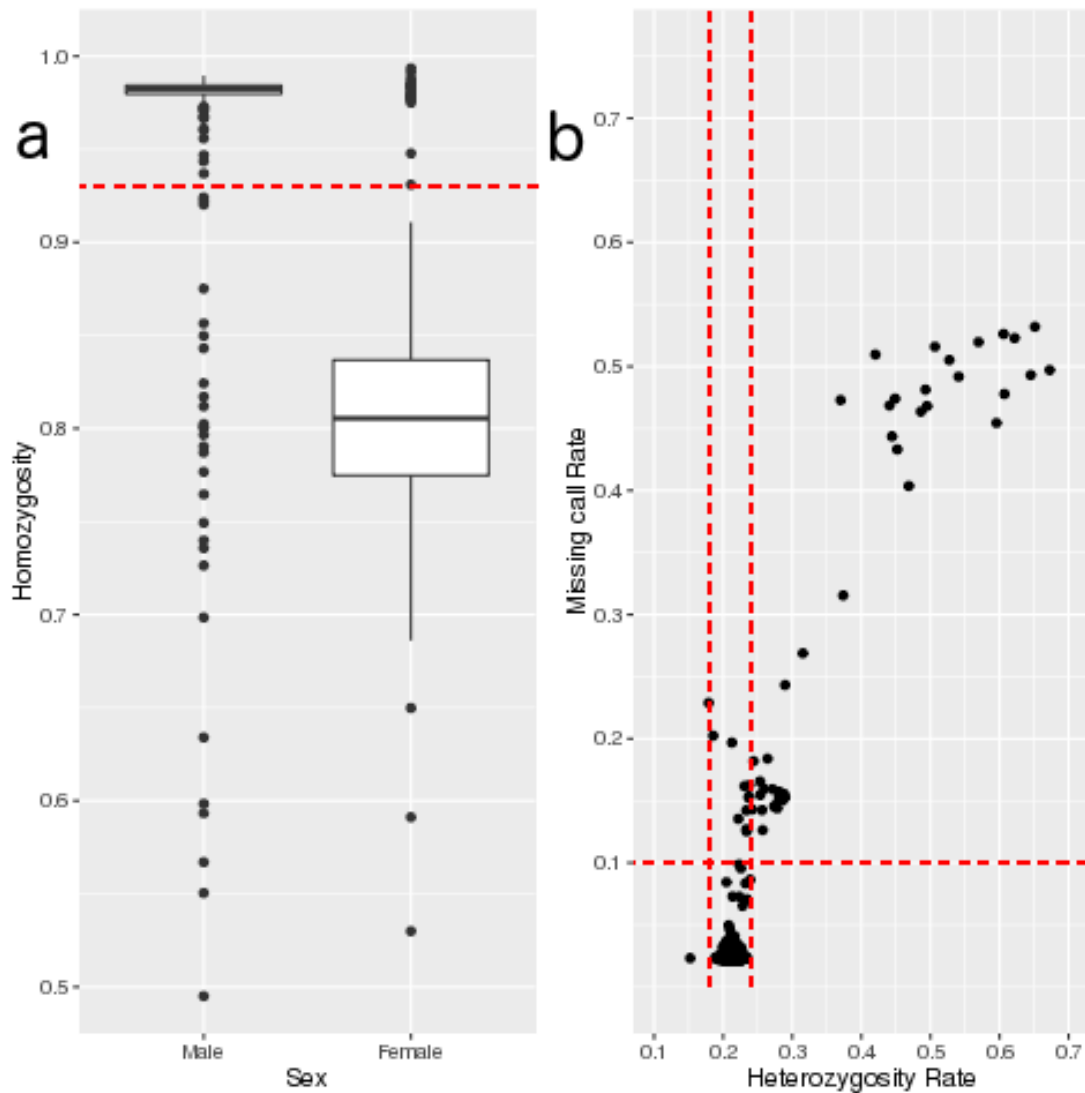

**ESM Figure 3:** Quality control plots for the dataset containing the Northern Irish GRID cases, Finnish IDDMGEN and T1DGEN cases and UK WARREN cohort affected sib-pairs. Panel a) shows the homozygosity rate on the X chromosome by sex, where one would expect males to have most alleles as homozygous. Low homozygosity rate in males or homozygosity rate close to 1 in females indicates poor genotyping or sample swaps and therefore samples are excluded from the analysis. Panel b) shows individuals with particularly high missingness or heterozygosity rate across the non-sex chromosomes, for which individuals are excluded from the analysis. Samples outside the red dashed lines were excluded.



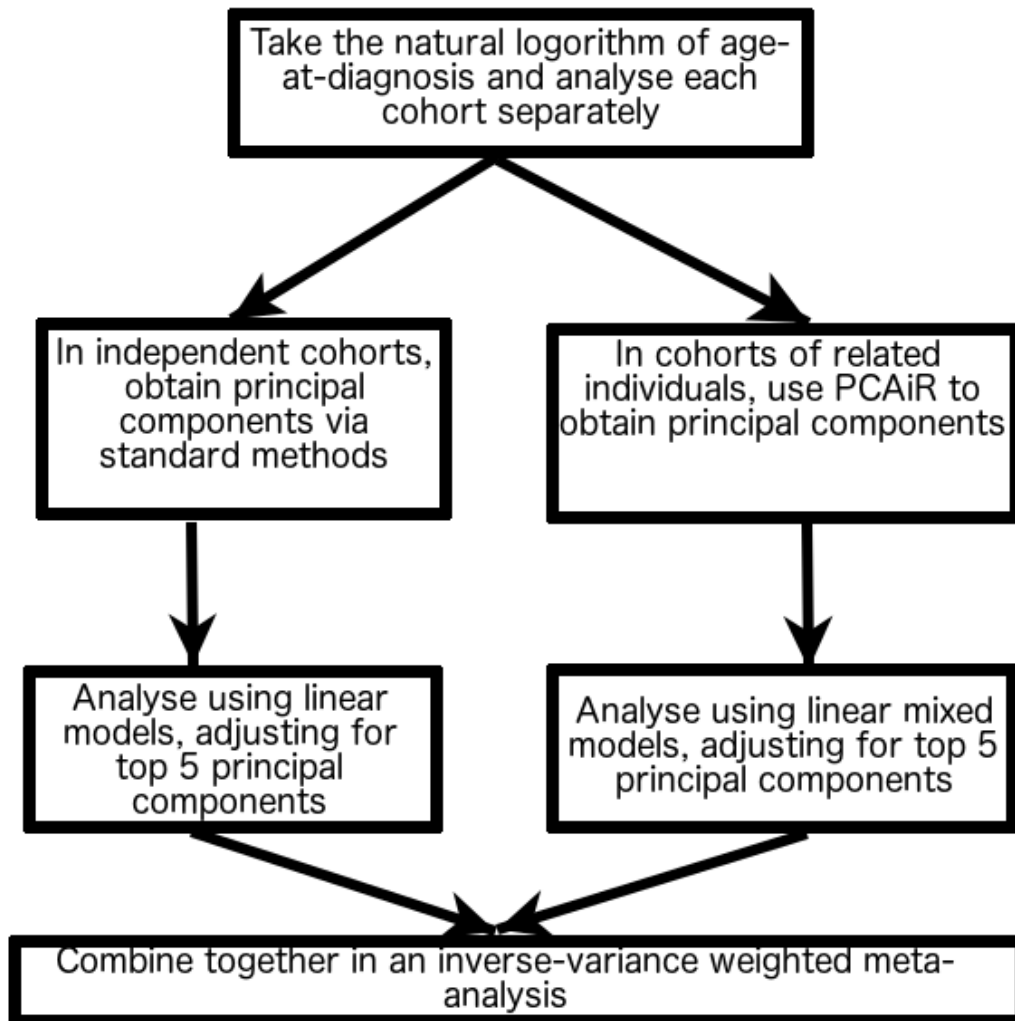

**ESM Figure 4:** Schematic diagram showing analysis pipeline for meta-analysis in the variant discovery analysis for age-at-diagnosis of type 1 diabetes.

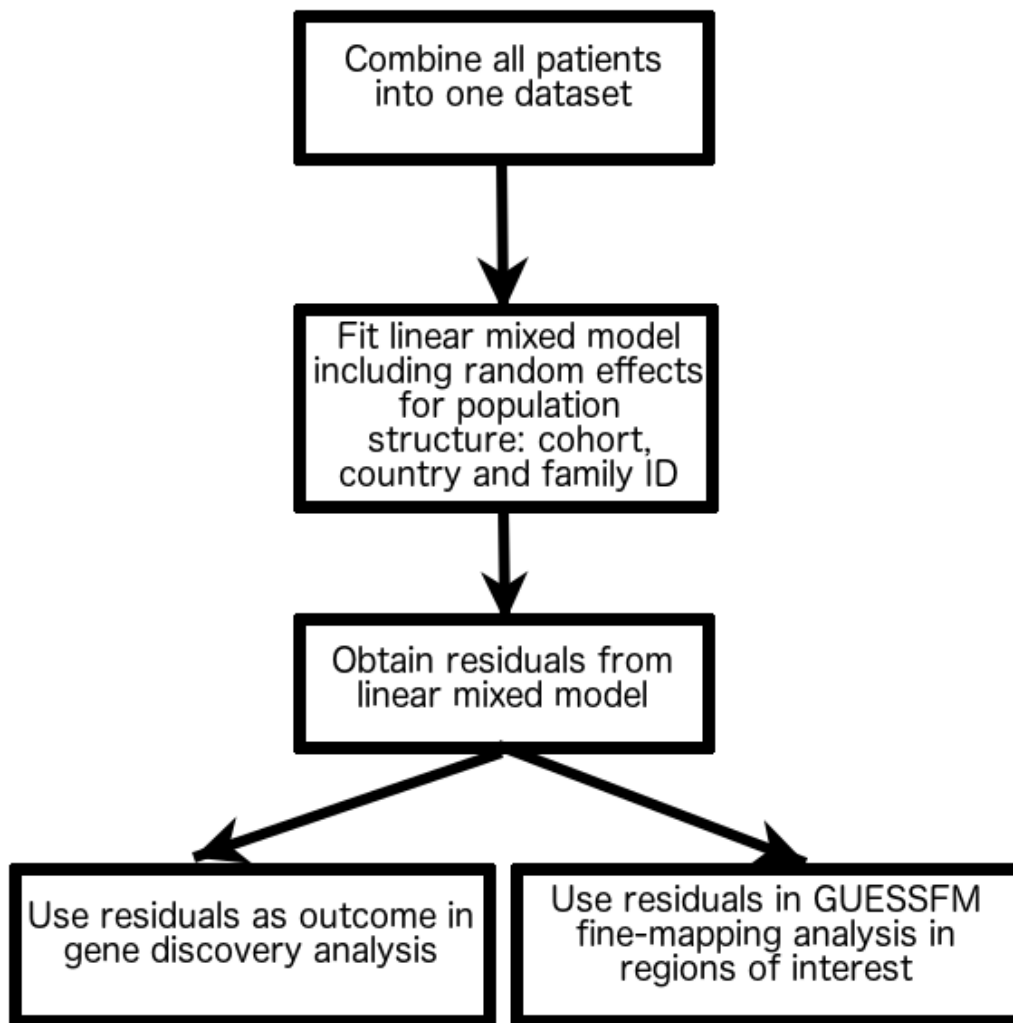

**ESM Figure 5:** Schematic diagram showing analysis pipeline for the residual-based model variant discovery analysis and fine-mapping of associated regions.

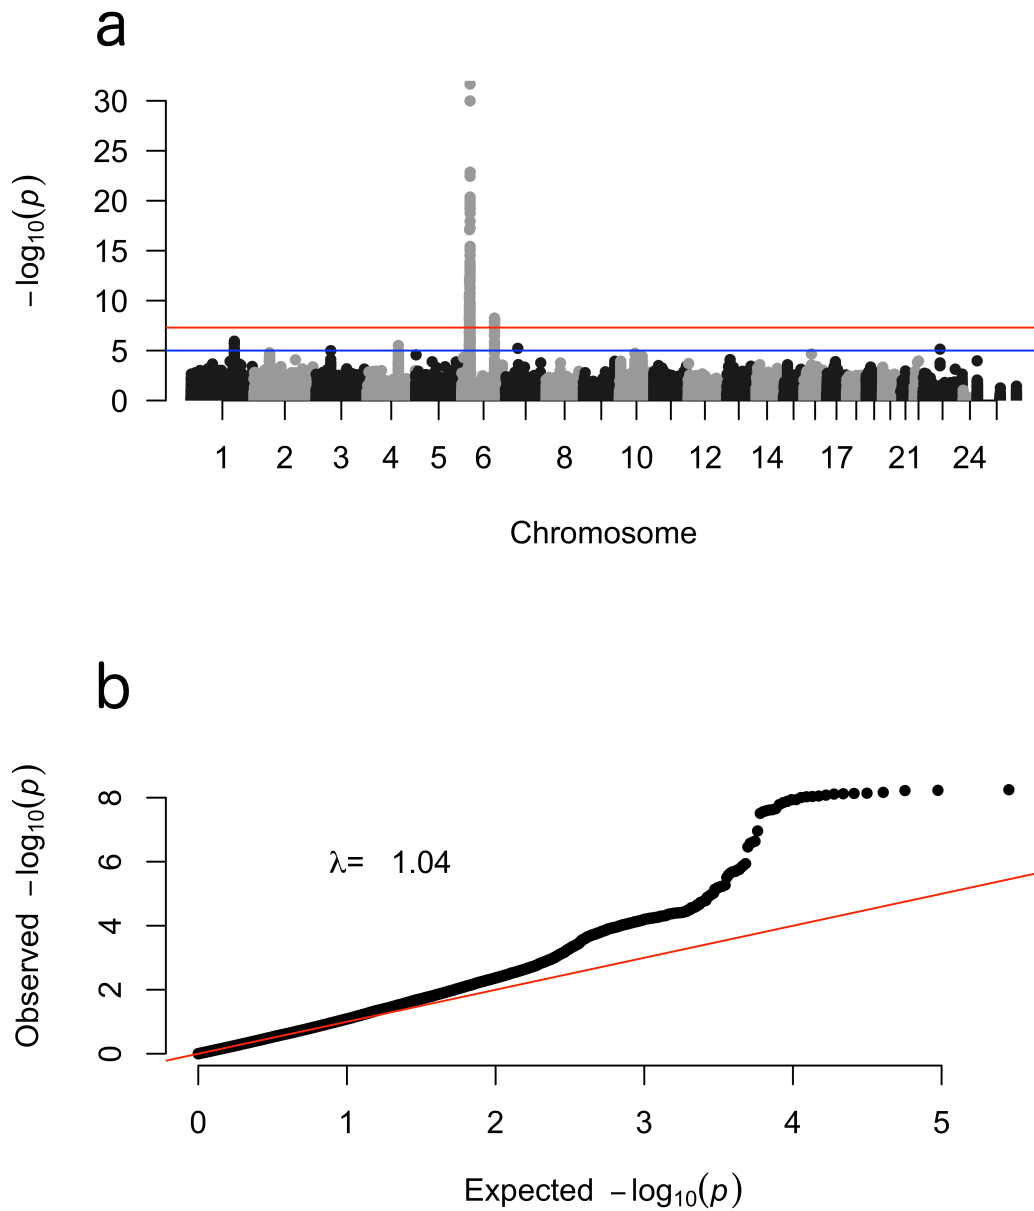

**ESM Figure 6:** Panel a) Manhattan plot and panel b) QQ plot (excluding the MHC region) for the residual-based model, examining genetic determinants of AAD of type 1 diabetes, with cut-off significance lines at  $-\log_{10}p = 5.0$  (blue) and  $-\log_{10}p = 8.0$  (red).

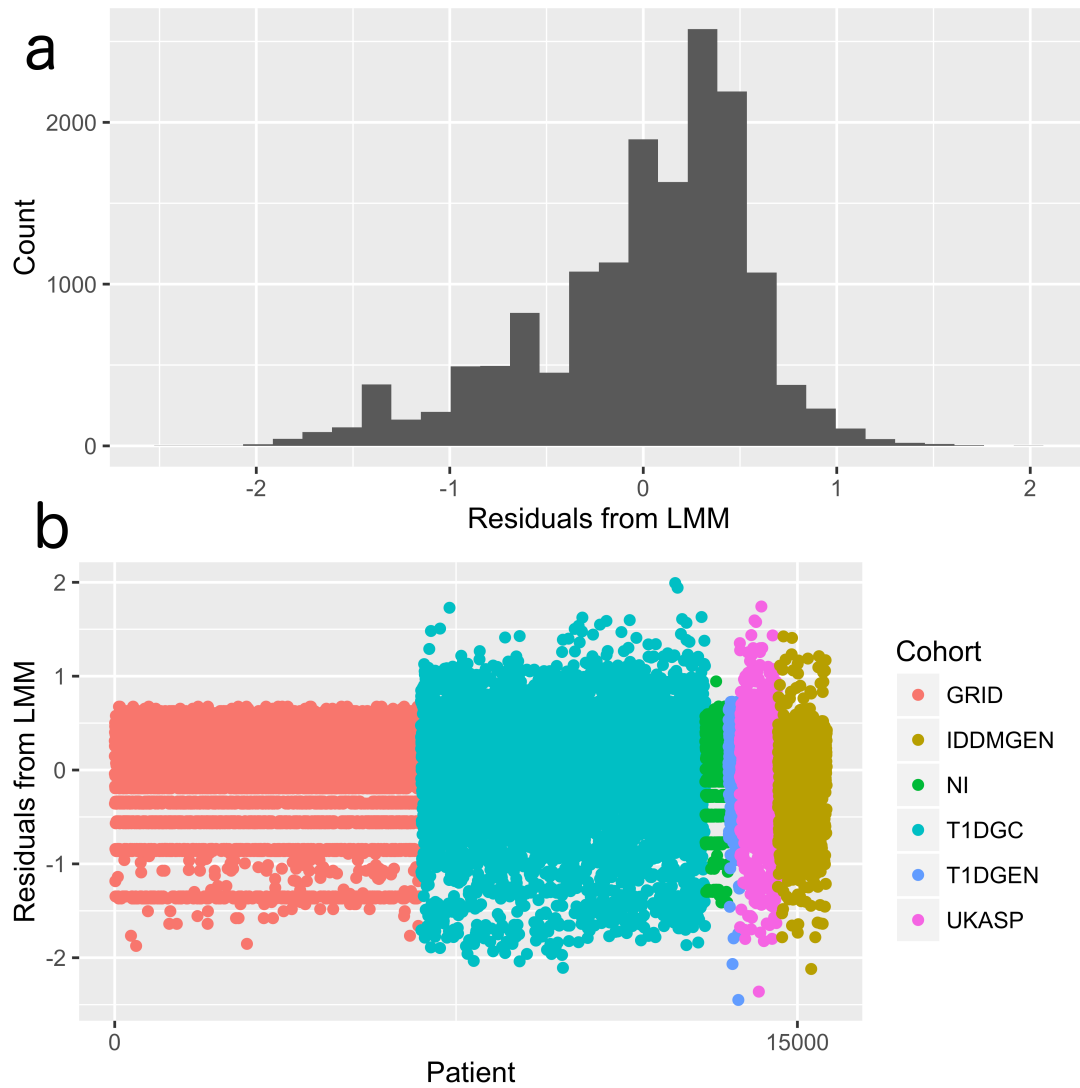

**ESM Figure 7:** Residual plots from the linear mixed model, with the natural logarithm of AAD as the outcome, adjusting for the fixed effect of sex and the random effects of country, cohort and family identifier. Panel a) shows a histogram of the residuals and panel b) shows the residuals plotted by individual, colour-coded by what cohort they are from.

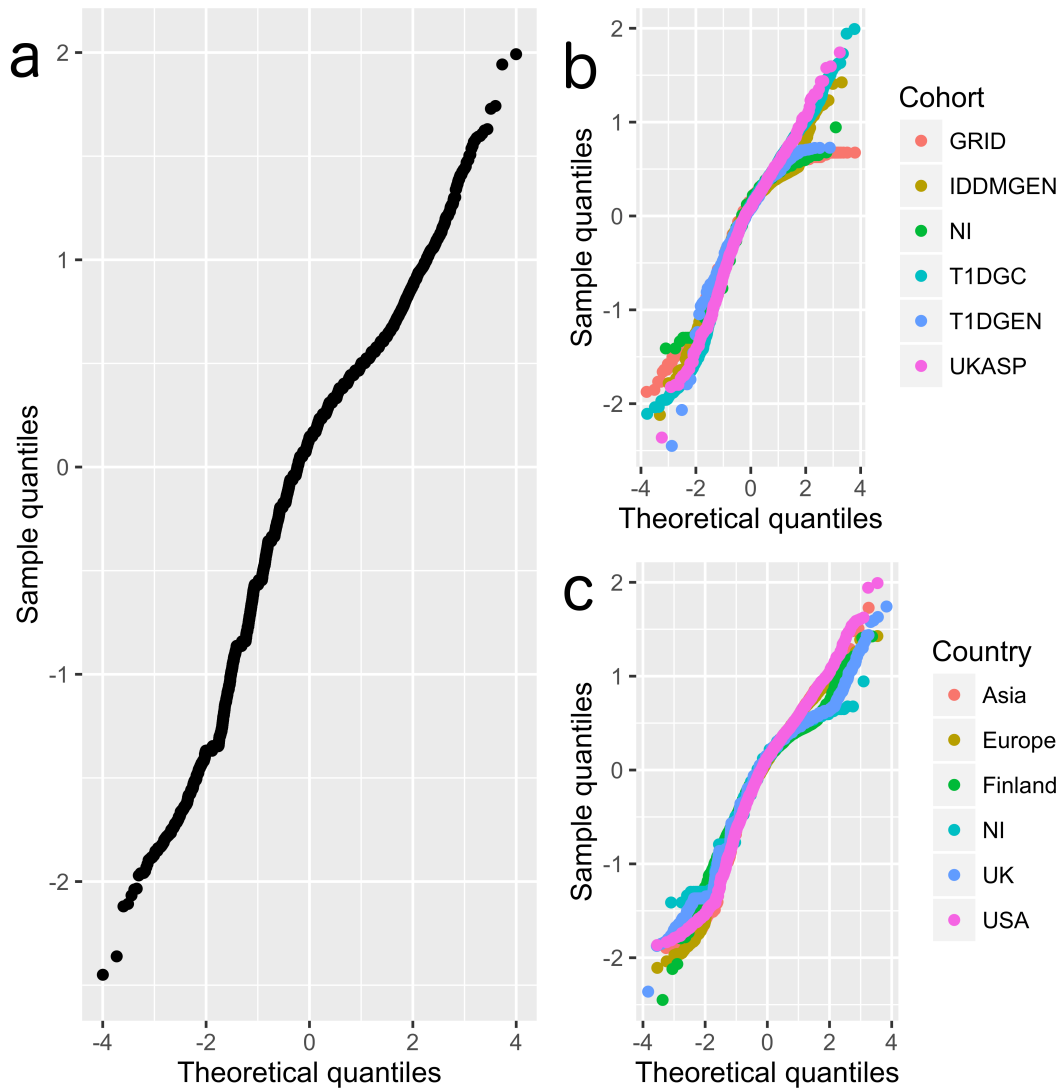

**ESM Figure 8:** Residual QQ plots from the linear mixed model, with the natural logarithm of AAD as the outcome, adjusting for the fixed effect of sex and the random effects of country, cohort and family identifier. Plot a) shows the QQ plot for all individuals in the dataset, whilst plots b) and c) are stratified by cohort and country, respectively.

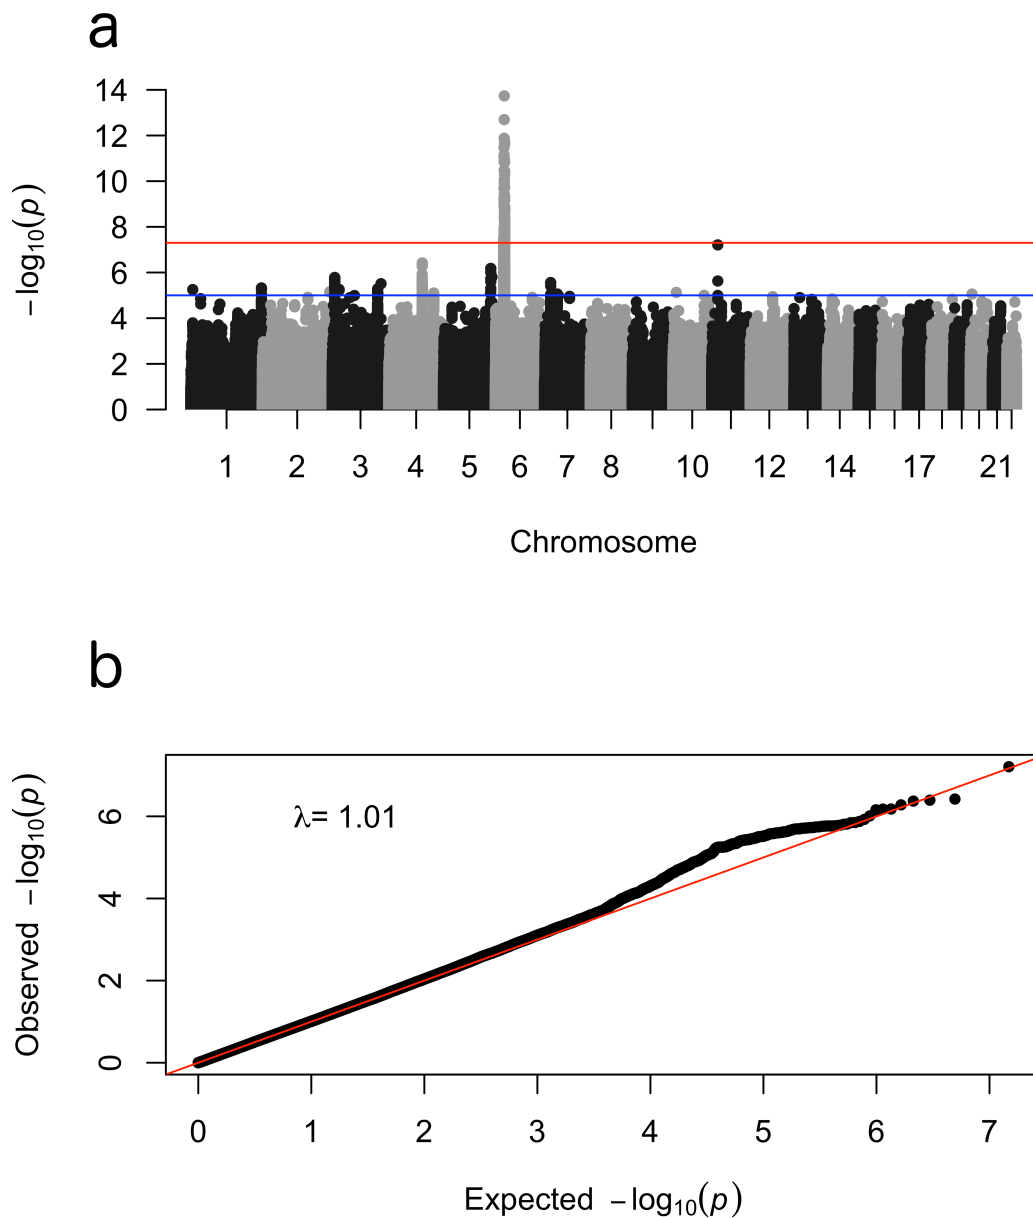

**ESM Figure 9:** Panel a) Manhattan plot and panel b) QQ plot (excluding the MHC region) for AAD of type 1 diabetes in UK GRID cases, imputing SNPs genome wide and meta-analysed combining two subsets of the GRID cohort, one that was genotyped using Affymetrix technology (N=1,768) and the other that was genotyped using the Illumina technology (N=3,833). Significance cut-off lines are at  $-\log_{10}p = 5.0$  (blue) and  $-\log_{10}p = 8.0$  (red).

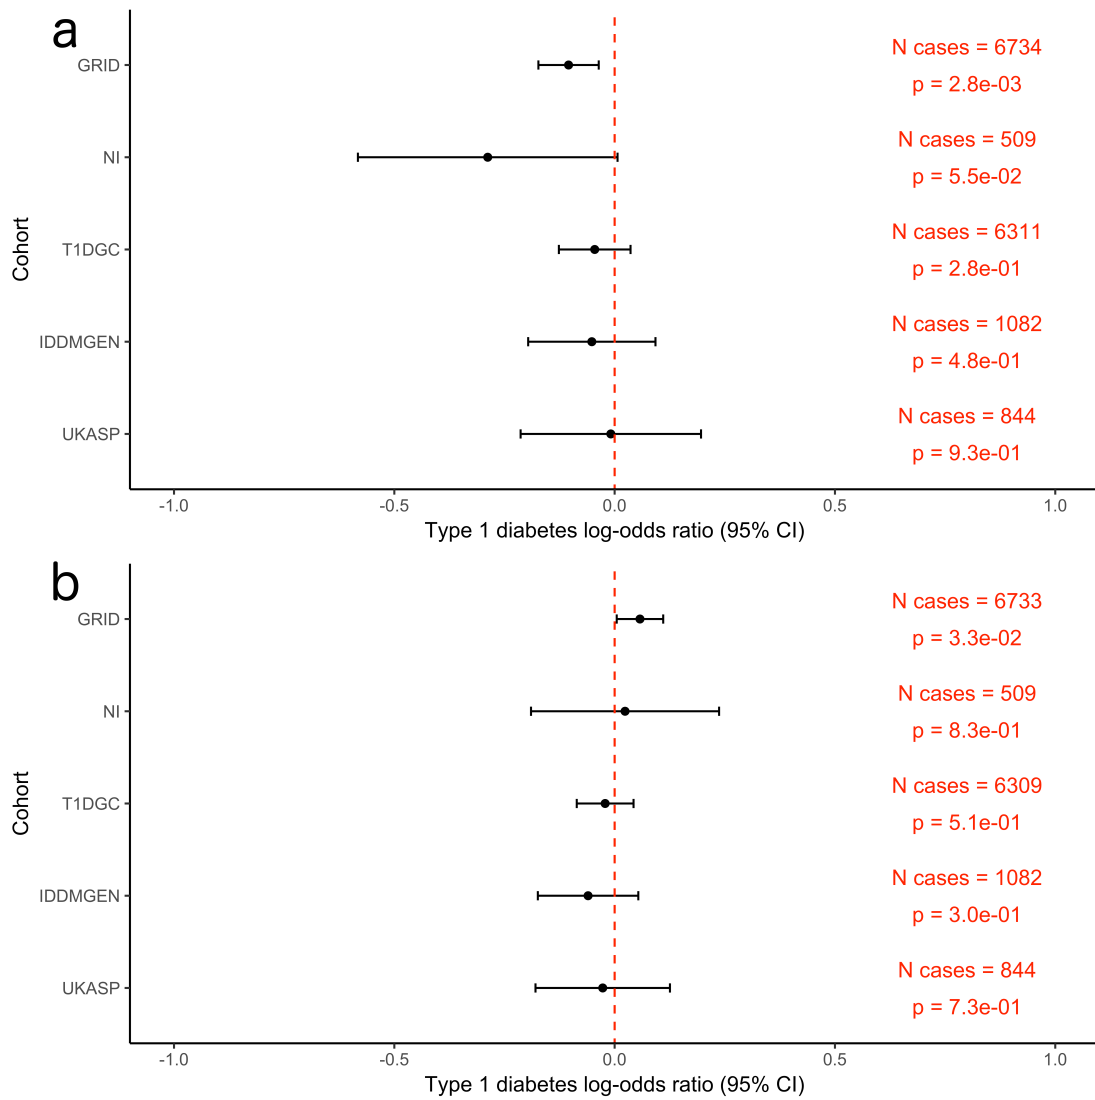

**ESM Figure 10:** Forest plot showing the effect of rs72975913 (panel a)) and rs802719 (panel b)) on type 1 diabetes risk overall in each cohort.

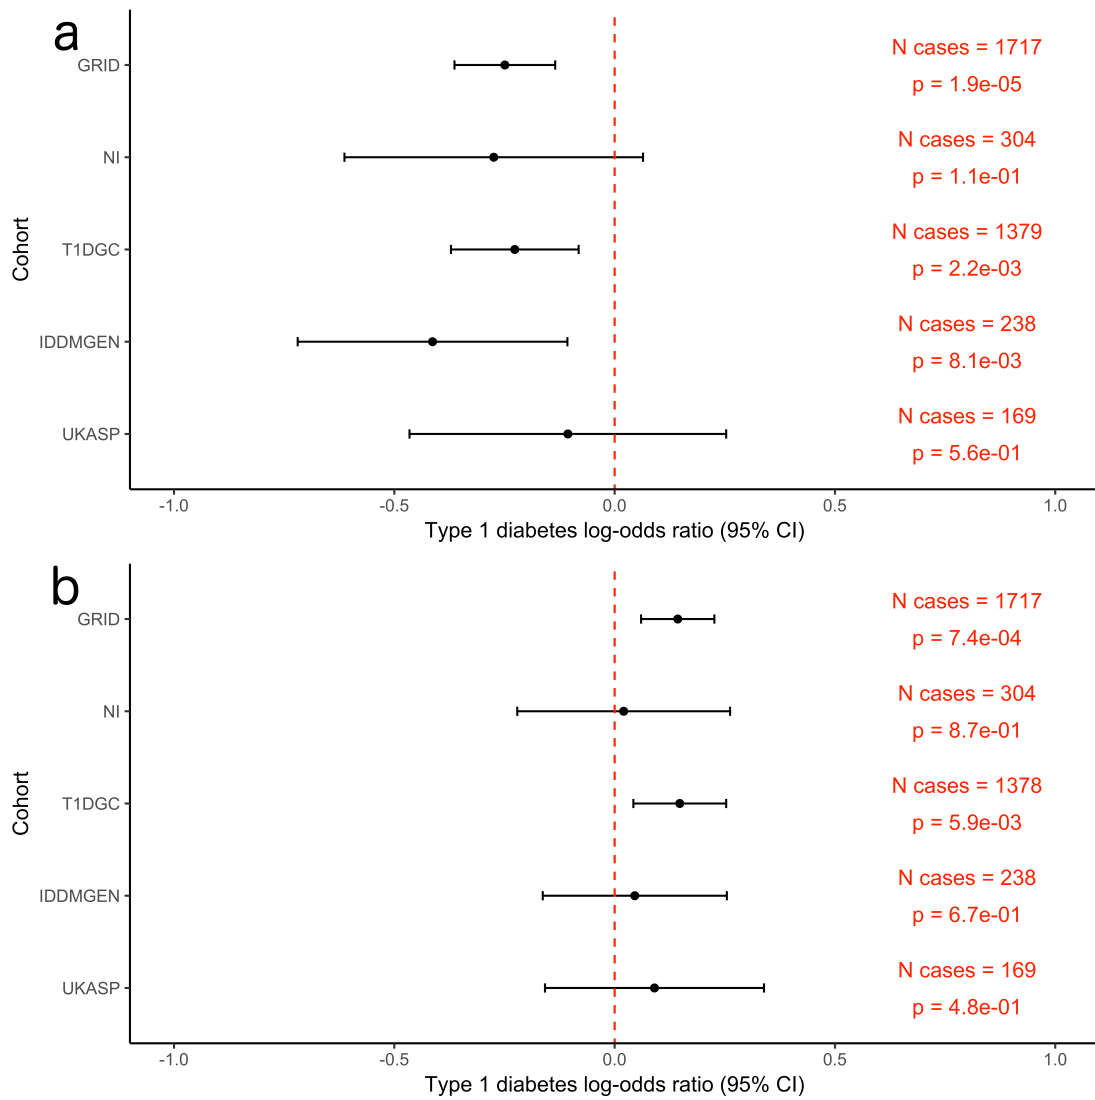

**ESM Figure 11:** Forest plot showing the effect of rs72975913 (panel a)) and rs802719 (panel b)) on type 1 diabetes risk in individuals diagnosed at <5 years old in each cohort.



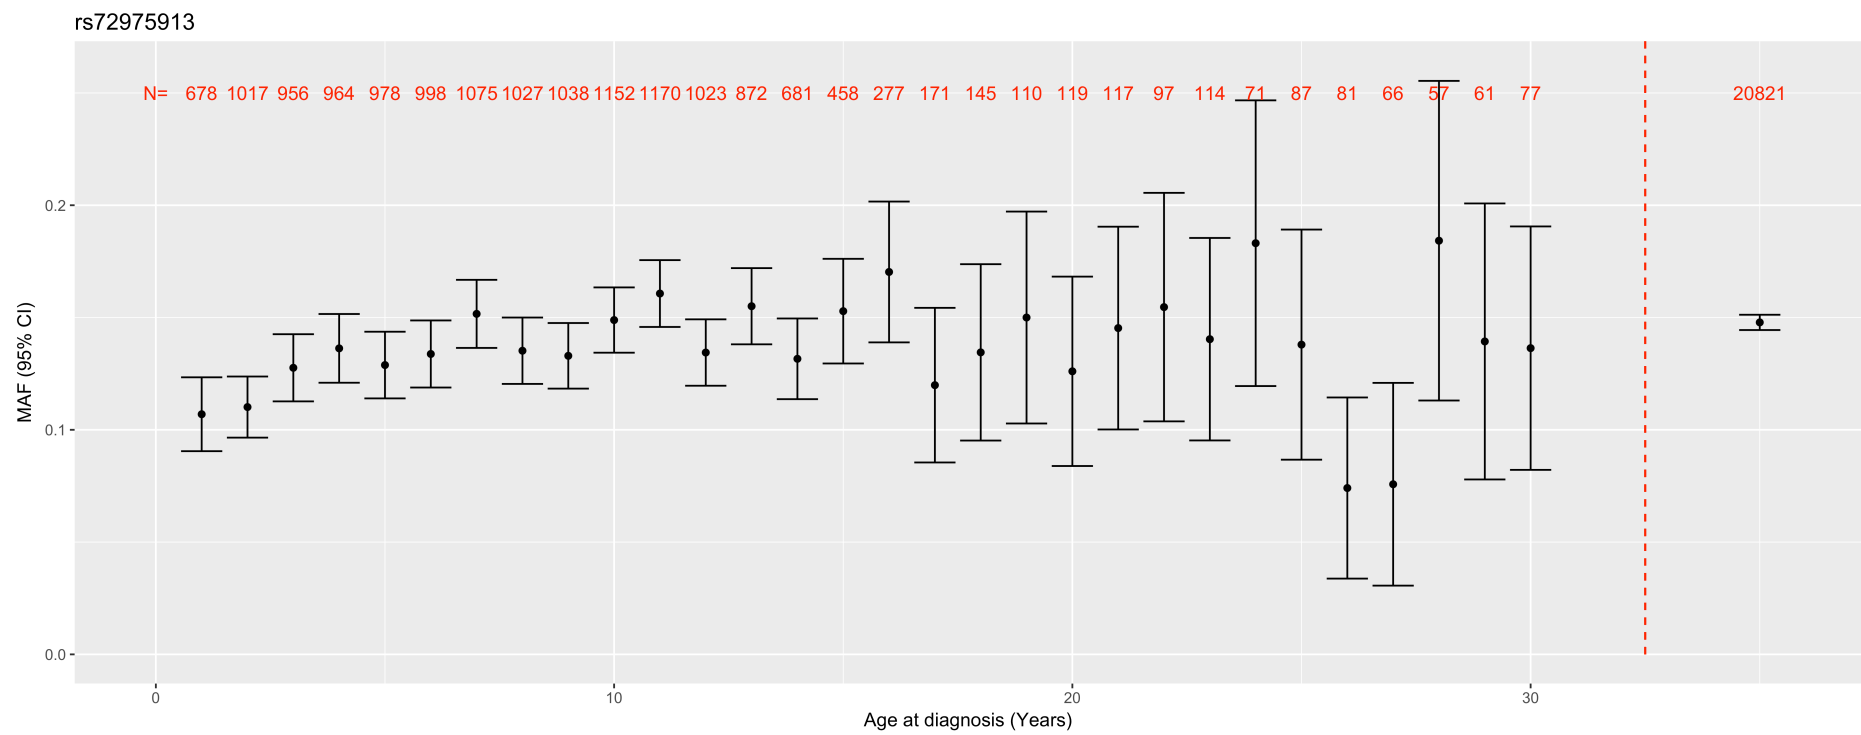

**ESM Figure 12:** Minor allele frequencies by age at diagnosis at rs72975913, compared with controls to the right of the dashed red line.

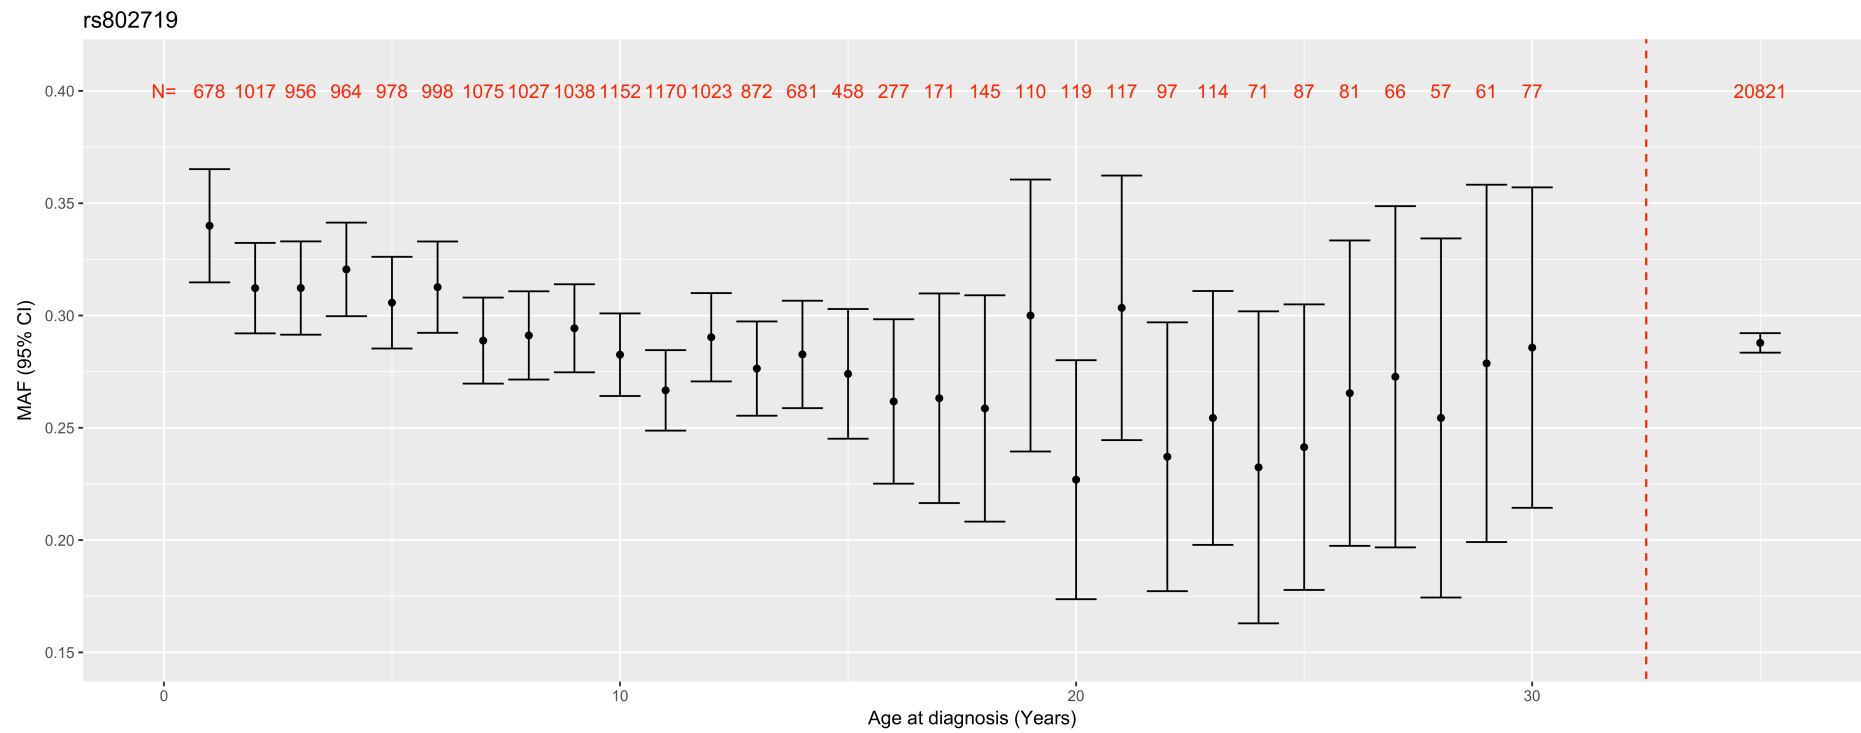

**ESM Figure 13:** Minor allele frequencies by age at diagnosis at rs802719, compared with controls to the right of the dashed red line.
